# Supplementary material for: Global Transmission, Spatial Segregation, and Recombination Determine the Long-Term Evolution and Epidemiology of Bovine Coronaviruses
Source: PubMed Central journal article supplement (PMC7290379; doi:10.3390/v12050534), 2020-05-13
Supplement: viruses-12-00534-s001.pdf [file viruses-12-00534-s001.pdf]

Type of the Paper (Article)

# Global transmission, spatial segregation and recombination determine the long-term evolution and epidemiology of Bovine Coronaviruses

**E. Salem<sup>1</sup>, D. Vijaykrishna<sup>2,3</sup>, H. Cassard<sup>1</sup>, B. Hause<sup>4</sup>, S. Maman<sup>5</sup>, G. Meyer<sup>1</sup>, M.F. Ducatez<sup>1\*</sup>**

<sup>1</sup> IHAP, Université de Toulouse, INRAE, ENVT, Toulouse, France

<sup>2</sup> Biomedicine Discovery Institute and Department of Microbiology, Monash University, Melbourne, Victoria 3800, Australia

<sup>3</sup> Program in Emerging Infectious Diseases, Duke-NUS Medical School, Singapore

<sup>4</sup> Diagnostic Medicine/Pathobiology, College of Veterinary Medicine, Kansas State University, Manhattan Kansas KS 66506-5802, USA

<sup>5</sup> SIGENAE, GenPhySE, Université de Toulouse, INRAE, INPT, ENVT, Castanet Tolosan, France.

\* Correspondence: [mariette.ducatez@envt.fr](mailto:mariette.ducatez@envt.fr)

Supplementary Materials:

**Supplementary Table 1.** Details of the strains used for S gene sequences analyses

| Accession number | Strain/isolate                 | Host species | Type of sample | Country     | Sampling year |
|------------------|--------------------------------|--------------|----------------|-------------|---------------|
| KU886219         | AKS 1                          | bovine       | -              | China       | 2015          |
| DQ389658         | KWD17                          | bovine       | enteric        | South Korea | 2002          |
| DQ389656         | KWD15                          | bovine       | enteric        | South Korea | 2002          |
| DQ389655         | KWD14                          | bovine       | enteric        | South Korea | 2002          |
| DQ389653         | KWD12                          | bovine       | enteric        | South Korea | 2002          |
| HM573330         | Nyala 10.01                    | Nyala        | enteric        | South Korea | 2010          |
| HM573326         | Wisent 10.01                   | Wisent       | enteric        | South Korea | 2010          |
| DQ389633         | KCD2                           | bovine       | enteric        | South Korea | 2004          |
| DQ389654         | KWD13                          | bovine       | enteric        | South Korea | 2002          |
| DQ389634         | KCD3                           | bovine       | enteric        | South Korea | 2004          |
| DQ389635         | KCD4                           | bovine       | enteric        | South Korea | 2004          |
| DQ389632         | KCD1                           | bovine       | enteric        | South Korea | 2004          |
| DQ389636         | KCD5                           | bovine       | enteric        | South Korea | 2004          |
| DQ389639         | KCD8                           | bovine       | enteric        | South Korea | 2004          |
| DQ389641         | KCD10                          | bovine       | enteric        | South Korea | 2004          |
| DQ389637         | KCD6                           | bovine       | enteric        | South Korea | 2004          |
| DQ389638         | KCD7                           | bovine       | enteric        | South Korea | 2004          |
| DQ389640         | KCD9                           | bovine       | enteric        | South Korea | 2004          |
| DQ389659         | KWD18                          | bovine       | enteric        | South Korea | 2002          |
| AY935643         | KWD7                           | bovine       | enteric        | South Korea | 2002          |
| DQ389652         | KWD11                          | bovine       | enteric        | South Korea | 2002          |
| DQ389657         | KWD16                          | bovine       | enteric        | South Korea | 2002          |
| DQ389660         | KWD19                          | bovine       | enteric        | South Korea | 2002          |
| KM985631         | HLJ-14/CHN                     | bovine       | enteric        | China       | 2014          |
| AY935641         | KWD5                           | bovine       | enteric        | South Korea | 2002          |
| AY935646         | KWD10                          | bovine       | enteric        | South Korea | 2002          |
| AY935637         | KWD1                           | bovine       | enteric        | South Korea | 2002          |
| AY935642         | KWD6                           | bovine       | enteric        | South Korea | 2002          |
| AY935638         | KWD2                           | bovine       | enteric        | South Korea | 2002          |
| AY935644         | KWD8                           | bovine       | enteric        | South Korea | 2002          |
| AY935639         | KWD3                           | bovine       | enteric        | South Korea | 2002          |
| AB354579         | kakegawa                       | bovine       | enteric        | Japan       | 1976          |
| EU401988.1       | SUN5                           | bovine       | enteric        | South Korea | 1994          |
| EU401987.1       | A3                             | bovine       | enteric        | South Korea | 1994          |
| MG757144         | BCoV/France/13-ICSA17-LBA/2014 | bovine       | respiratory    | France      | 2014          |
| MG757140         | BCoV/France/11-ICSA16-LBA/2014 | bovine       | respiratory    | France      | 2014          |
| MG757139         | BCoV/France/12-ICSA16-EN/2014  | bovine       | respiratory    | France      | 2014          |

|          |                               |         |             |         |      |
|----------|-------------------------------|---------|-------------|---------|------|
| MG757138 | BCoV/France/ICSA21L3/LBA/2014 | bovine  | respiratory | France  | 2014 |
| MG757143 | BCoV/France/2-ICSA4-EN/2014   | bovine  | respiratory | France  | 2014 |
| KF169922 | SWE/AC/06-1                   | bovine  | enteric     | Sweden  | 2006 |
| KF169924 | SWE/M/06-4                    | bovine  | enteric     | Sweden  | 2006 |
| KF169940 | SWE/P/10-4                    | bovine  | enteric     | Sweden  | 2010 |
| KF169939 | SWE/Y/10-3                    | bovine  | enteric     | Sweden  | 2010 |
| KF169938 | SWE/M/10-2                    | bovine  | enteric     | Sweden  | 2010 |
| KF169937 | SWE/M/10-1                    | bovine  | enteric     | Sweden  | 2010 |
| KT318119 | BCoV/FRA/EPI/Caen/2013/09     | bovine  | enteric     | France  | 2013 |
| KT318123 | BCoV/FRA/EPI/Caen/2014/13     | bovine  | enteric     | France  | 2014 |
| KT318121 | BCoV/FRA/EPI/Caen/2013/11     | bovine  | enteric     | France  | 2013 |
| KT318122 | BCoV/FRA/EPI/Caen/2014/12     | bovine  | enteric     | France  | 2014 |
| KT318118 | BCoV/FRA/EPI/Caen/2013/08     | bovine  | enteric     | France  | 2013 |
| KT318117 | BCoV/FRA/EPI/Caen/2012/07     | bovine  | enteric     | France  | 2012 |
| KF169914 | DEN/03-2                      | bovine  | enteric     | Denmark | 2003 |
| EU019216 | Buffalo                       | Buffalo | enteric     | Italy   | 2007 |
| KT318112 | BCoV/FRA/EPI/Caen/2005/02     | bovine  | enteric     | France  | 2005 |
| KT318124 | BCoV/FRA/EPI/Caen/2004/14     | bovine  | enteric     | France  | 2004 |
| KT318113 | BCoV/FRA/EPI/Caen/2007/03     | bovine  | enteric     | France  | 2007 |
| KF169933 | SWE/I/08-3                    | bovine  | enteric     | Sweden  | 2008 |
| EU814647 | 438/06-TN                     | bovine  | respiratory | Italy   | 2006 |
| KT318114 | BCoV/FRA/EPI/Caen/2008/04     | bovine  | enteric     | France  | 2008 |
| KT318116 | BCoV/FRA/EPI/Caen/2010/06     | bovine  | enteric     | France  | 2010 |
| KF169909 | SWE/02-1                      | bovine  | respiratory | Sweden  | 2002 |
| KF169910 | SWE/02-2                      | bovine  | respiratory | Sweden  | 2002 |
| KF169912 | SWE/02-4                      | bovine  | respiratory | Sweden  | 2002 |
| KF169935 | SWE/C/09-2                    | bovine  | respiratory | Sweden  | 2009 |
| KF169929 | SWE/I/07-5                    | bovine  | enteric     | Sweden  | 2007 |
| KF169934 | SWE/P/09-1                    | bovine  | enteric     | Sweden  | 2009 |
| KF169921 | SWE/N/05-2                    | bovine  | enteric     | Sweden  | 2005 |
| KF169920 | SWE/N/05-1                    | bovine  | enteric     | Sweden  | 2005 |
| KF169923 | SWE/M/06-3                    | bovine  | enteric     | Sweden  | 2006 |
| KF169936 | SWE/U/09-3                    | bovine  | respiratory | Sweden  | 2009 |
| KF169930 | SWE/C/07-6                    | bovine  | enteric     | Sweden  | 2007 |
| KF169925 | SWE/Z/07-1                    | bovine  | enteric     | Sweden  | 2007 |
| KF169932 | SWE/C/08-2                    | bovine  | enteric     | Sweden  | 2008 |
| KF169931 | SWE/AC/08-1                   | bovine  | enteric     | Sweden  | 2008 |
| KF169926 | SWE/C/07-2                    | bovine  | enteric     | Sweden  | 2007 |
| EF445634 | 339/06                        | bovine  | enteric     | Italy   | 2006 |
| KF169917 | DEN/05-2                      | bovine  | enteric     | Denmark | 2005 |
| KF169919 | DEN/05-4                      | bovine  | enteric     | Denmark | 2005 |

|            |                           |        |             |                  |      |
|------------|---------------------------|--------|-------------|------------------|------|
| KF169918   | DEN/05-3                  | bovine | respiratory | Denmark          | 2005 |
| KT318111   | BCoV/FRA/EPI/Caen/2005/01 | bovine | respiratory | France           | 2005 |
| KT318115   | BCoV/FRA/EPI/Caen/2003/05 | bovine | enteric     | France           | 2003 |
| KF169915   | DEN/03-3                  | bovine | enteric     | Denmark          | 2003 |
| KF169913   | DEN/03-1                  | bovine | enteric     | Denmark          | 2003 |
| KF169908   | SWE/C/92                  | bovine | enteric     | Sweden           | 1992 |
| M80844     | Giessen                   | bovine | respiratory | Germany          | 1989 |
| D00731.1   | Bovine                    | bovine | enteric     | France           | 1979 |
| AF391541   | BCoV-ENT                  | bovine | enteric     | USA Texas        | 1998 |
| DQ915164   | Alpaca                    | bovine | enteric     | USA Oregon       | 1998 |
| AF391542   | BCoV-LUN                  | bovine | respiratory | USA Texas        | 1998 |
| AF058943   | LSU-94LSS-051-2           | bovine | respiratory | USA<br>Louisiana | 1994 |
| AF058944   | OK-0514-3                 | bovine | respiratory | USA              | 1996 |
| AF058942   | LY138                     | bovine | enteric     | USA Utah         | 1965 |
| AF220295   | Quebec                    | bovine | –           | Quebec           | 1972 |
| U00735     | Mebus                     | bovine | enteric     | USA              | 1972 |
| KF272919.1 | RVLC7                     | bovine | enteric     | Ireland          | 2011 |

**Supplementary Table 2.** Details of the strains used for N gene sequences analyses

| Accession number | Strain/ isolate                | Host species | Type of sample | Country     | Sampling year |
|------------------|--------------------------------|--------------|----------------|-------------|---------------|
| KU886219.1       | BCV-AKS-01                     | Bovine       | -              | China       | 2015          |
| M36656.1         | F15                            | Bovine       | enteric        | France      | 1979          |
| EU019216.1       | Bubalus/Italy/179/07-11        | Bubalus      | enteric        | Italy       | 2006          |
| KM985634.1       | HLJ-14/CHN                     | Bovine       | enteric        | China       | 2014          |
| EU401983.1       | A3                             | Bovine       | enteric        | South Korea | 1994          |
| EU401984.1       | SUN5                           | Bovine       | enteric        | South Korea | 1994          |
| AB354579.1       | Kakegawa                       | Bovine       | enteric        | Japan       | 1976          |
| U00735.2         | Mebus                          | Bovine       | enteric        | USA         | 1972          |
| KT318083.1       | BCoV/FRA/EPI/Caen/2005/02      | Bovine       | enteric        | France      | 2005          |
| KT318087.1       | BCoV/FRA/EPI/Caen/2003/05      | Bovine       | enteric        | France      | 2003          |
| KT318084.1       | BCoV/FRA/EPI/Caen/2005/01      | Bovine       | respiratory    | France      | 2005          |
| KT318085.1       | BCoV/FRA/EPI/Caen/2007/03      | Bovine       | enteric        | France      | 2007          |
| KT318096.1       | BCoV/FRA/EPI/Caen/2004/14      | Bovine       | enteric        | France      | 2004          |
| KT318088.1       | BCoV/FRA/EPI/Caen/2010/06      | Bovine       | enteric        | France      | 2010          |
| KT318086.1       | BCoV/FRA/EPI/Caen/2008/04      | Bovine       | enteric        | France      | 2008          |
| MG757140         | BCoV/France/11-ICSA16-LBA/2014 | Bovine       | respiratory    | France      | 2014          |
| MG757141         | BCoV/France/ICSA17_LBA/2014    | Bovine       | respiratory    | France      | 2014          |
| MG757142         | BCoV/France/19-pool-LBA/2014   | Bovine       | respiratory    | France      | 2014          |
| MG757139         | BCoV/France/12-ICSA16-EN/2014  | Bovine       | respiratory    | France      | 2014          |
| MG757138         | BCoV/France/ICSA21L3LBA/2014   | Bovine       | respiratory    | France      | 2014          |

|            |                           |                       |             |                 |      |
|------------|---------------------------|-----------------------|-------------|-----------------|------|
| KT318092.1 | BCoV/FRA/EPI/Caen/2013/10 | Bovine                | enteric     | France          | 2013 |
| KT318089.1 | BCoV/FRA/EPI/Caen/2012/07 | Bovine                | enteric     | France          | 2012 |
| KT318095.1 | BCoV/FRA/EPI/Caen/2014/13 | Bovine                | enteric     | France          | 2014 |
| KX982264.1 | BCoV                      | Bovine                | enteric     | France          | 2014 |
| KT318093.1 | BCoV/FRA/EPI/Caen/2013/11 | Bovine                | enteric     | France          | 2013 |
| KT318094.1 | BCoV/FRA/EPI/Caen/2014/12 | Bovine                | enteric     | France          | 2014 |
| KT318090.1 | BCoV/FRA/EPI/Caen/2013/08 | Bovine                | enteric     | France          | 2013 |
| KT318091.1 | BCoV/FRA/EPI/Caen/2013/09 | Bovine                | enteric     | France          | 2013 |
| EU401980.1 | 0501                      | Bovine                | enteric     | South Korea     | 2005 |
| EU401981.1 | 0502                      | Bovine                | enteric     | South Korea     | 2005 |
| AF058943.1 | LSU-94LSS-051-2           | Bovine                | respiratory | USA             | 1994 |
| AF058944.1 | OK-0514-3                 | Bovine                | respiratory | USA             | 1996 |
| FJ425186.1 | US/OH-WD358/1994          | Waterbuck             | enteric     | USA             | 1994 |
| FJ425185.1 | US/OH-WD358-GnC/1994      | Waterbuck             | enteric     | USA             | 1994 |
| DQ811784.2 | DB2                       | Bovine                | -           | Maryland<br>USA | 1984 |
| FJ425189.1 | US/OH-WD388/1994          | Sambar<br>deer        | enteric     | USA             | 1994 |
| EF424621.1 | US/OH1/2003               | Sable<br>antelope     | enteric     | USA             | 2003 |
| EF424623.1 | US/OH3/2003               | Giraffe               | enteric     | USA             | 2003 |
| AF391542.1 | BCoV-LUN                  | Bovine                | respiratory | Texas USA       | 1998 |
| AF391541.1 | BCoV-ENT                  | Bovine                | enteric     | Texas USA       | 1998 |
| EF424617.1 | R-AH65                    | Bovine                | respiratory | Ohio USA        | 2001 |
| DQ915164.2 | Alpaca                    | Alpaca                | enteric     | USA             | 1998 |
| EF424620.1 | R-AH187                   | Bovine                | respiratory | Ohio USA        | 2000 |
| FJ425187.1 | US/OH-WD470/1994          | White-<br>tailed deer | enteric     | Ohio USA        | 1994 |
| AF058942.1 | LY 138                    | Bovine                | enteric     | Utah USA        | 1965 |
